# Supplementary material for: Paradoxical network excitation by glutamate release from VGluT3+ GABAergic interneurons
Source: eLife. 2020 Feb 13;9:e51996. doi: 10.7554/eLife.51996 (PMC7039679; doi:10.7554/eLife.51996)
Supplement: Figure 1—source data 1. [file elife-51996-fig1-data1.xlsx]

## Sheet: Sheet1
Fig 1A					Fig 1B				Fig 1C
Bouton density					% colocalization				%colocalization
P5 CA1	P5CA3				CB1R+VGluT3+/CB1R+				VGluT3+/CB1R+ along segment
0.00144	0.006895				34.3182				100
0.00064	0.005799				26.7313				100
0.00112	0.009245				26.8806				100
0.00192	0.008905				37.3717				100
0.00168	0.001568				29.5364				100
0.00336	0.002083				25.6711				100
0.00144	0.002371				45.1908				100
0.00208					36.9231				100
0.00152					38.7052				90
0.00602					VGluT3+CB1R+/VGluT3+				93.3333
0.006561					99.4681				92
0.009778					96.0317				100
0.008551					98.6047				95.2381
0.002745					99.308				96.875
0.000535					96.8354				100
0.003576					100				93.3333
					99.2754				87.5
P15 CA1	P15 CA3				97.4074				100
0.00864	0.012958				99.5169				100
0.009744	0.012161				VGluT3+VGAT+/VGluT3+				100
0.00928	0.012797				95.3782				100
0.0064	0.012912				97.2868				96.7742
0.010762	0.008316				94.0351				92.5926
0.010977	0.008779				95.7031				100
0.011311					96.6942				100
0.007911					92.7273				100
0.004817					98.2716				96.2963
0.001693					100				92.5926
					94.8718				VGluT3+ n
P30 CA1	P30 CA3				97.6471				8
0.00864	0.025613				98.855				4
0.010128	0.030584				97.7987				12
0.009072	0.01986				93.4211				18
0.007536	0.024709				94.3038				11
0.009504	0.015266				VGluT3+GAD+/VGluT3+				13
0.012048	0.017351				87.395				11
0.006288	0.014299				98.062				13
0.005424	0.015374				96.4912				9
0.007392					97.6562				14
0.01176					98.7603				23
0.00816					96.7273				19
0.012496					98.0247				20
0.011545					100				31
0.005445					98.4615				10
0.017608					97.6471				14
0.009696					98.4733				14
0.011008					98.7421				18
0.010325					98.0263				19
0.00699					93.6709				20
					VGluT3+Syt2+/VGluT3+				24
P60 CA1	P60 CA3				0.757576				30
0.01104	0.012548				0.578035				25
0.007968	0.015237				1.11111				23
0.008448	0.013914				0				20
0.008016	0.014902				3.63636				21
0.012281	0.016973				3.14465				26
0.013553	0.022635				2.04082				25
0.012042					3.1746				495
0.016388
0.016825
0.020625
