# Supplementary material for: Paradoxical network excitation by glutamate release from VGluT3+ GABAergic interneurons
Source: eLife. 2020 Feb 13;9:e51996. doi: 10.7554/eLife.51996 (PMC7039679; doi:10.7554/eLife.51996)
Supplement: Figure 2—figure supplement 2—source data 1. [file elife-51996-fig2-figsupp2-data1.xlsx]

## Sheet: Sheet1
Fig2-fig supp 2 A			Fig2-fig supp 2B				Fig2-fig supp 2C
ratio			VGluT3/CB1R	CB1R density			BC Axon Length
P5			P10	P10			P13-15
0.333333			0.237354	0.02056			26049
0.258065			0.269625	0.02344			16734.9
0.214286			0.228137	0.02104			32009.2
0.344262			0.320242	0.02648			15783.2
0.125			0.167382	0.01864			19288.5
0.214286			0.205128	0.00624			21597
0.285714			0.203922	0.0204			32206.3
0.222222			0.261044	0.01992
			0.219512	0.01968			P30-40
P10							24753.2
0.561983			P90	P90			26857.7
0.525806			0.397695	0.02776			22040.4
0.753036			0.341096	0.02336			14384.5
			0.325926	0.02592			14466.1
P15			0.34198	0.02344			11847.9
0.901515							27665.2
0.856089							35717.4
0.760125							27883.6
0.880368
P30
0.926752
0.917647
0.932609
0.990991
