# Supplementary material for: Paradoxical network excitation by glutamate release from VGluT3+ GABAergic interneurons
Source: eLife. 2020 Feb 13;9:e51996. doi: 10.7554/eLife.51996 (PMC7039679; doi:10.7554/eLife.51996)
Supplement: Figure 2—source data 1. [file elife-51996-fig2-data1.xlsx]

## Sheet: Sheet1
Fig 2A				Fig 2B
Cell Density				% overlap VGluT3/CCK
P5CA1	P5CA3			CA1 total norm VGluT3	CA1 total norm CCK
14.7964	127.636			76.4706	44.8276
14.7072	46.4887			86.6667	52
49.5815	27.2897			88.8889	47.0588
37.2991	25.8643			64.2857	45
54.6639	102.619			88.8889	80
19.0402	24.8568			77.7778	46.6667
23.987	62.4637			66.6667	50
22.2	27.27			68.9655	37.037
7.14	15.79			75	31.9149
6.89	15.38			92.8571	56.5217
4.35	19.05			78.5714	45.8333
5.88	12.5			81.8182	36
4.34	25			80	46.1538
4.34	22.58			68	62.963
				--	48.2759
P15CA1	P15CA3			% overlap VGluT3/SOM
52.245	75.6805			CA1 total norm VGluT3	CA1 total norm SOM
72.1123	87.0894			23.5294	9.52381
105.651	141.799			26.6667	9.30233
99.8467	94.2241			11.1111	3.22581
86.8411	108.829			14.2857	5.71429
103.407	139.059			33.3333	15.7895
108.507	211.994			22.2222	10.2564
30.23	40			25.9259	12.7273
42.8	53.49			31.0345	13.0435
30.55	77.78			30	10.9091
43.18	60			21.4286	8.57143
57.58	73.33			7.14286	2.94118
30	67.65			18.1818	6.45161
				20	10.3448
				8	4.7619
P30CA1	P30CA3			27.7778	12.1951
41.3245	76.3413			% overlap VGluT3/PV
59.0012	129.288			CA1 total norm VGluT3	CA1 total norm PV
84.323	93.8348			6.89655	5.71429
57.6078	83.5076			7.14286	5.71429
66.5605	75.962			0	0
63.0969	130.862			6.25	2.7027
63.0491	115.192			0	0
47.36	43.18			5.88235	3.125
38.09	88.64			2.77778	2.94118
41.18	64.86			0	0
35.29	39.29			9.67742	10.7143
64.86	54.83			8	4.16667
31.58	43.75			0	0
				5	4.34783
P60CA1	P60CA3			4.7619	2.7027
73.529	65.0416			0	0
68.9448	66.6385			0	0
39.7268	51.7707			% overlap VGluT3/VIP
36.1631	64.4576			CA1 total norm VGluT3	CA1 total norm VIP
49.7113	111.827			0	0
49.6169	111.827			0	0
31.9724	64.6341			0	0
				6.25	0
				0	0
				0	0
				0	0
				0	0
				0	0
				0	0
				0	0
				0	0
				0	0
				0	0
				0	0
