# Supplementary material for: Paradoxical network excitation by glutamate release from VGluT3+ GABAergic interneurons
Source: eLife. 2020 Feb 13;9:e51996. doi: 10.7554/eLife.51996 (PMC7039679; doi:10.7554/eLife.51996)
Supplement: Figure 3—source data 1. [file elife-51996-fig3-data1.xlsx]

## Sheet: Sheet1
Fig 3B			Fig 3C						Fig 3D
Amplitudes			SR						DSI
BC	DTI		Spike	BC mean	SEM	DTI mean	SEM		BC	DTI
381.442	258.889		1	5.58735	1.49265	2.3369	0.42407		41	79
172.55	73.3084		2	3.51311	0.44772	2.03194	0.66457		0	79
327.646	384.493		3	3.46337	0.45915	2.15074	0.69323		66	99
342.53	109.4		4	1.88806	0.68862	2.34017	0.93431		96	11
109.99	71.31		5	2.98285	0.44182	1.77001	0.24945		93	91
316.05	58.74		6	1.80364	0.38338	2.20427	0.5312		92	87
140.647	28.5873		7	1.80803	0.43096	1.73006	0.3475		3	36
113.136	117.727		8	1.85568	0.20014	1.60451	0.471		72	31
55.17	50.3011		9	2.02488	0.55815	1.61808	0.34114		91	47
139.44	47.4		10	1.11131	0.10741	1.53133	0.30342		73	81
235.104	117.49		11	1.36506	0.19861	1.51545	0.2813		96
176.938	49.97		12	1.23511	0.12831	1.04975	0.15637		89
97.93			13	1.24481	0.08144	1.21989	0.2001		12
575.11			14	0.80064	0.11979	1.5294	0.2963		83
274.226			15	1.07139	0.04301	1.142	0.1729		16
84.5835			16	1.20444	0.12718	1.10784	0.28007		91
276.38			17	0.75704	0.08228	1.41288	0.28903		58
104.74			18	0.72783	0.09117	1.14825	0.32896		100
481.954			19	1.08869	0.14772	1.27787	0.30051		69
63.421			20	0.95083	0.12478	1.2596	0.24035		70
516.521			21	0.65579	0.1298	1.13887	0.18416		99
297.995			22	0.87287	0.06429	1.46807	0.3876		40
			23	0.90866	0.07528	1.31485	0.31585
			24	0.98678	0.08699	1.22574	0.34627
Potency			25	1.46476	0.58109	1.08085	0.31152
BC	DTI
381.442	258.889
128.38	40.9384
327.646	384.493
231.02	101.98
98.98	64.18
242.301	52.87
140.647	24.7756
98.0511	117.727
49.66	35.2108
79.02	28.44
195.92	117.49
159.244	36.6446
94.66
575.11
274.226
42.2917
276.38
81.1768
481.954
45.83
516.521
297.995
Successes
BC	DTI
1	1
0.733	0.5
1	1
0.733	0.93
0.9	0.9
0.767	0.9
1	0.867
0.867	1
0.867	0.7
0.567	0.6
0.833	1
0.9	0.733
0.967
1
1
0.5
1
0.67
1
1
1
1
CV
BC	DTI
0.56	0.45
0.85	1.03
0.37	0.32
0.69	0.54
0.57	0.68
0.655	0.59
0.53	0.64
0.28	0.51
0.26	1
0.54	0.99
0.41	0.48
0.85	0.99
0.29
0.368
0.37
0.45
Tau Decay
BC	DTI
0.80069	0.93958
0.49862	0.53064
0.72813	0.9129
0.57182	1.27792
0.93351	1.00596
0.58888	0.67576
1.61999	1.00413
0.90125	2.24749
1.00987	0.6803
0.8419	0.91418
0.84117
0.75083
1.18897
2.21205
0.45898
0.75167
0.98307
0.89554
PPR
BC	DTI
1.08	0.79
0.995	0.79
0.91	0.65
1.25	1.18
0.84	0.87
0.85	0.9
0.79	1
1.12	0.788
0.64	0.94
0.89	0.8
1.1	1.04
0.97
0.75
0.9
1.1
0.41
1.17
0.78
1.29
0.95
0.973
