# Supplementary material for: Paradoxical network excitation by glutamate release from VGluT3+ GABAergic interneurons
Source: eLife. 2020 Feb 13;9:e51996. doi: 10.7554/eLife.51996 (PMC7039679; doi:10.7554/eLife.51996)
Supplement: Figure 4—figure supplement 1—source data 1. [file elife-51996-fig4-figsupp1-data1.xlsx]

## Sheet: Sheet1
Fig 4-fig supp 1B				Fig 4-fig supp 1C
G				Glu G
GABA	Glu			ACSF	Cocktail
68.1905	0			0.4104	0.82079
66.4762	0			0.24624	0.32832
25.2381	0			0.1368	3.31053
38.2857	0			0.31464	1.19015
45.2381	0			0.31737	1.06703
18.5714	0			0.44186	0.15048
				0.82079	1.50479
				0.68673	2.55814
				1.62791	1.99726
				0.1026	0.4104
				1.45007	0.53352
				0.14911	0.32832
				0.75239	1.60055
				0.34063	1.20383
				0.13543	0.342
				0.0985	0.4104
				0.70862	0.30096
				0.5472	0.69767
				0.24761	0.21888
				0.31737	0.39672
				0.56224	0.80711
				0.14637
				0.513
				0.88098
				1.24213
				0.81395
				0.21888
				0.18741
				0.18468
				0.50752
				0.11491
				0.08618
				0.33379
				0.10944
				0.20383
				0.49248
				0.40356
				0.25171
				0.23256
				0.36936
				0.24897
				0.19836
				0.08482
				0.56224
				0.18194
