# Supplementary material for: Paradoxical network excitation by glutamate release from VGluT3+ GABAergic interneurons
Source: eLife. 2020 Feb 13;9:e51996. doi: 10.7554/eLife.51996 (PMC7039679; doi:10.7554/eLife.51996)
Supplement: Figure 4—source data 1. [file elife-51996-fig4-data1.xlsx]

## Sheet: Sheet1
Fig 4B							Fig 4C				Fig 4D							Fig 4E						Fig 4F									Fig 4G					Fig 4H					Fig 4I					Fig 4K
Event	Mean	SEM	Latency				GABA G	Glu G			Vh	I GABA	SEM	I Glu	SEM			Tau Decay						Ctl	DNQX	Ctl	GYKI	Ctl	DGG	Wash			GABA DSI					Glu DSI					Glu BAPTA DSI					uPSC G
1	35.0763	8.28967	GABA	Glu			3.37255	0.4104			-80							GABA -50	Glu -70	GABA -70	Glu CTZ			1	0.11638	1	0.13333	1	0.11111	0.55556			Ctl	DSI	Recover			Ctl	DSI	Recover			Ctl	DSI	Recover			GABA	Glu
2	40.2577	10.5999	4.3	3.6			4.31373	0.24624			-70	-76.4195	13.3205	-43.6	10.3258			7.9	5.1	7.9	3.3			1	0.03163	1	0	1	0.44911	0.74682			80	8	88			21.7	5.2	23.5			22.6	16.9	19.6			1.7	0.1
3	34.5877	7.98234	3.3	3.44			2.9	0.1368			-60	-13.2304	5.30483					10.1	3.7	8.1	4.3			1	0.11215	1	-0.0934	1	0.55556	0.93333			77	3	55			6.2	1.2	4.2			34	38	41			3.6	0.67
4	33.5408	8.4469	2.24	2.14			9.52381	0.31464			-50	103.368	26.0585	-30	8.02385			14.5	6.8	10.3	7.1			1	0.10667	1	0.14478	1	0.31544	1.02013			37	32	32			14.4	0	16.7			65	57	65			0.91	0.55
5	29.5082	7.35839	2.5	2.5			3.14286	0.31737			-40							12.1	7.9	5.1	10.3			1	0.03727	1	0.03279	1	0.325	0.70833			84	72	85			13.1	2	13.6			8.8	11.5	8.7				0.25
6	30.2841	8.24223	2.74	2.74			13	0.44186			-30			-16.7889	5.4521			19	4.6	7.6	10.8			1	0.02017	1	0	1	0.31522	0.83696			45	37	52			22.2	5.1	27.6			73.8	59.2	70.7				0.27
7	20.6221	9.68161	2.41	2.41			7.5	0.82079			-20								3	7.3	10.9			1	0	1	0.10169	1	0.41176	0.82353			76	12	80			33.7	7	28.2			19.6	18.2	18.4				0.27
8	19.9508	7.82883	1.7	1.4			4	0.68673			-10			-5.09286	2.07796			15.7	6.6	11.4	10.1			1	0	1	0.02222	1	0.11278	0.81203			31.2	12	26.2			14	6.7	13.3			39.9	32.5	37.3				0.16
9	6.5371	8.14326	1.9	3.8			32.8571	1.62791			0								3.2	10	5.7			1	0.03704	1	0.07692	1	0				76.7	38.7	78.2			16.7	0	10.1			18.1	18	19.2			2.09836	0.06803
10	3.48461	8.33965	2.79	2.79			6.02857	0.1026			10			3.96571	0.96378			15.6	4.4	14.5	8.2			1	0.07817	1	0.1931						177	153	179			24.4	10.2	20.8								2.62295	0.05442
11	-2.25187	8.86873	1.53	1.75			8.19048	1.45007			20							12.4	6	11.4	5.9			1	0.03095	1	0.09677						64.1	14.2	65.9			29.9	0	39									0.08163
12	-4.62045	5.53507	1.26	1.26			3.66667	0.14911			30			15.24	3.53106			14.1	3.7	17.7	5			1	0	1	0.01217						79.2	29	70.1			41.1	2.9	49.6								4.81967	0.20408
13	-10.051	5.42842	1.49	1.49			3.74286	0.75239			40							15	3	6.4	7.6												73.2	22	67.7			37	0	49								0.62295	0.14966
14	-10.4267	4.30774	2.06	1.41			0.85714	0.34063			50			24.6143	3.90759				4.2	7.4													78.5	49	71													0.95082	0.2585
15	-20.3093	5.76691	2.76	3.26			1.47619	0.13543										16.4	4.7														44.6	32.7	47.6													1.27869	0.36735
16	-16.0464	5.36814	4.12	4.12			2.12381	0.0985										8.3	3.6														70.5	20.4	63.5													0.42623	0.06803
17	-17.8368	5.10423	2.21	2.21			35.0476	0.70862										15.5	6.2														116	95	111													0.44262	0.13605
18	-15.8686	4.51861					14.9619	0.5472										15.1	5.2														107	52	89													0.27213	0.06803
19	-20.8804	6.92872					12.3524	0.24761										12.9	4														88.5	36.5	65.7
20	-15.1606	4.7862					8.35238	0.31737										12	3.8														187.4	160	178.3
21	-18.8213	5.54905					19.9048	0.56224										10.9	3.5														87.1	50	72
22	-11.4083	2.95314					2.86667	0.14637										13	3														179	24	152
23	-16.1801	3.26877					7.68571	0.513										10.7	3.1
24	-19.9856	5.4385					12.1905	0.88098										6.4	2.4
25	-15.8523	4.38474					16.1905	1.24213										10.4	5.6
26	-22.4422	4.50288					4.21905	0.81395										11.1	5.4
							2.67619	0.21888											2.2
							5.53333	0.18741										10.7	3.3
							6.06667	0.18468										16.8	7.1
							8.55238	0.50752										16.8	7.1
							6.57143	0.11491										13.5	10.3
							6.33333	0.08618										19.3	10.8
							5.94545	0.33379										12.1	10.9
							3.8	0.10944										10.9	10.1
							4.89091	0.20383										9.5	5.7
							2.69091	0.49248										10.6	8.2
							4.30909	0.40356										8	5.9
							3.03636	0.25171										8	5
							2.07273	0.23256										21	7.6
							1.92727	0.36936										15.7	7.4
							2.55238	0.24897
							1.92381	0.19836
							0.5619	0.08482
							2.27273	0.56224
							2.76364	0.18194
[truncated: 4 more columns]
