# Supplementary material for: Paradoxical network excitation by glutamate release from VGluT3+ GABAergic interneurons
Source: eLife. 2020 Feb 13;9:e51996. doi: 10.7554/eLife.51996 (PMC7039679; doi:10.7554/eLife.51996)
Supplement: Figure 5—figure supplement 1—source data 1. [file elife-51996-fig5-figsupp1-data1.xlsx]

## Sheet: Sheet1
Fig 5-fig supp 1F
Peak F
Ctl	488 on	488 off
30.5176	32.959	32.959
37.8418	36.6211	37.8418
32.959	28.0762	32.959
29.2969	34.1797	29.2969
30.5176	34.1797	29.2969
32.959	35.4004	30.5176
32.959	34.1797	35.4004
31.7383	31.7383	31.7383
34.1797	34.1797	29.2969
29.2969	29.2969	26.8555
31.7383	26.8555	29.2969
26.8555	24.4141	26.8555
29.2969	26.8555	26.8555
26.8555	26.8555	24.4141
26.8555	21.9727	26.8555
26.8555	19.5312	29.2969
32.959	32.959
Peak Power
Ctl	488 on	488 off
7.7338e-05	2.97077e-06	5.31322e-05
0.000280188	2.81999e-05	0.000259603
0.00024041	1.57809e-05	0.000173149
2.37904e-05	7.08504e-06	2.88894e-05
0.000205777	4.57343e-05	0.000191481
0.000870382	0.000431811	0.000783171
0.000794563	0.000809195	0.000734662
2.65125e-05	1.76169e-05	1.94323e-05
1.1291e-05	7.77666e-06	9.56472e-06
7.53839e-05	4.41827e-05	7.72058e-05
1.69817e-05	1.14992e-05	2.18368e-05
5.8671e-05	2.88792e-05	6.06676e-05
0.000304397	0.000306136	0.000404884
9.76378e-06	5.54742e-06	1.13667e-05
1.40036e-05	6.24214e-06	1.37157e-05
2.66562e-05	6.99986e-06	3.25574e-05
3.24408e-05	1.4384e-05
Band Power
Ctl	488 on	488 off
0.000308487	8.37581e-05	0.00033705
0.00279	0.000487027	0.00287
0.00145	0.000182808	0.00163
0.00031642	0.000237741	0.000391165
0.00161	0.000578561	0.00178
0.01029	0.00481	0.01006
0.00715	0.00447	0.00735
0.000118549	9.68648e-05	0.000120057
9.56989e-05	7.25685e-05	9.81809e-05
0.000491579	0.000272903	0.00047256
0.000142666	0.00247	0.00405
0.000343571	0.000200734	0.000370929
0.00178	0.00135	0.00217
6.55594e-05	4.39029e-05	7.62675e-05
0.000121093	4.61031e-05	0.000125041
0.000202391	5.07855e-05	0.000245735
0.000303849	0.000138663
