# Supplementary material for: Paradoxical network excitation by glutamate release from VGluT3+ GABAergic interneurons
Source: eLife. 2020 Feb 13;9:e51996. doi: 10.7554/eLife.51996 (PMC7039679; doi:10.7554/eLife.51996)
Supplement: Figure 5—source data 1. [file elife-51996-fig5-data1.xlsx]

## Sheet: Sheet1
Fig 5A								Fig 5B					Fig 5C				Fig 5D								Fig 5G					Fig 5L
Ctl			SCZD					Ctl	DSI	Recover			Ctl ACSF	SCZD ACSF			B6+			B6-					% Slices	%Sweeps				GABA/Glu
GABA	Glu	GABA/Glu	GABA	Glu	GABA/Glu			28	3	29			17	3.48087			GABA	Glu	GABA/Glu	GABA	Glu	GABA/Glu				Ctl	WIN			Ctl ACSF	SCZD ACSF
5.33333	0.82192	6.48889	0	0.80822	0			48	5	23			5.37313	6.26557			9.95	0.24624	40.4081	2.8	0.56088	4.9922			22	50	0			21.4133	0.5241
3.2381	0.32877	9.84921	0	0.41096	0			30	3	20			1.65455	3.25328			5.95	1.14911	5.17792	0.75						40				24.2117	10.8564
5.2381	1.19178	4.39518	0	1.67123	0			31	7	27			30.8459	4.00033			26.2	3.76197	6.96444	1	1.08071	0.92532				70				12.6533	2.98998
2.85714	1.06849	2.67399	0	3.76712	0			50	11	39			48.1967				6.2	0.53352	11.621	2.6	2.2435	1.1589				40				2.2952	3.18995
2.38095	0.15068	15.8009	0	1.49315	0			30	0	23			23.6164				2.15	0.43776	4.91141	0.95						60	0
56.4762	9.15068	6.1718	1.90476	2.87671	0.66213			41	3	53			4.16244				2.1	0.17784	11.8085	0	0.58824	0				90	0
2.85714	1.50685	1.8961	0	2.54795	0								3.67817				3.1	0.19152	16.1864	0.7						100	0
3.61905	2.56164	1.41278	0	6.9726	0												5.2	0.58824	8.84		1.64159					71	0
4.09524	2	2.04762	0	1.52055	0												3.7	0.36936	10.0174	17.15	1.08071	15.8692				46	0
32.8571	1.9589	16.7732	0	3.50685	0												2.4	0.42408	5.65935	16.45	1.79207	9.17935				80	80
2	0.41096	4.86667	0	0.24658	0												3	0.15048	19.9364	7.05	0.35568	19.8213				60
2.38095	0.53425	4.45665	0	1.0411	0												3	0.84815	3.5371		1.40903					10
11.2381	0.32877	34.1825	1.2381	2.78082	0.44523												2.8	0.49248	5.68556		0.83447					100	0
8.38095	1.60274	5.22914	0	8.84932	0												0.75	0.2736	2.74125	5.4	0.32832	16.4475				100	0
1.42857	1.20548	1.18506	0	2	0												1.65	0.38304	4.30768	4.2	0.64295	6.53234				80	20
8.57143	0.34247	25.0286	0	1.26027	0												2.3	0.60192	3.82114		0.65663					80	0
7.80952	0.41096	19.0032	0	0.94521	0												8.15	0.4104	19.8588	1.25	0.12312	10.1528				92	0
4.38095	0.30137	14.5368	0	2.12329	0												2.15	0.38304	5.61304	0.55	0.28728	1.91452				70
0.7619	0.69863	1.09057	0	3.12329	0												6.35	0.4104	15.4728	0.95	0.58824	1.615				53	0
5.71429	0.21918	26.0714	0	2.27397	0												12.55	0.39672	31.6347	1.1	0.21888	5.02562				70	30
5.61905	0.39726	14.1445	0	0.72603	0												7.15	0.19152	37.3332	1.55	0.08208	18.8842				70	0
2.28571	0.80822	2.82809	0.38095	0.41096	0.92698												3.8	0.1368	27.778		1.05335					100	70
			0	0.75342	0												5.2	0.19152	27.1514	0.25	0.09986	2.50342				80
																	8.4	0.2052	40.936	2	0.42408	4.71613				33
																				3.6	1.19015	3.02483				80	70
																				12.5	1.09439	11.4219
																					2.25718
																				1.6	0.28728	5.56952
																					1.12175
																				15.75	3.24213	4.85791
																				19.8	0.97127	20.3856
																				3	5.49932	0.54552
																				1.5	0.86183	1.74048
																				0.5	1.72367	0.29008
																				0.25	0.4788	0.52214
																				1.7	0.68399	2.4854
																				0.7	0.65663	1.06604
																					0.93023
																				1.2	1.10807	1.08296
																				0.275	0.31464	0.87402
																				2.3	2.3119	0.99485
																				2.15	1.24487	1.72709
																				0.2	0.30096	0.66455
																				0.35	0.64295	0.54436
																				0.6	0.75239	0.79745
																				1.55	0.30096	5.15023
																				0.7	0.2052	3.41133
																				2.2	0.82079	2.68033
																				4.85	0.45144	10.7435
																				0	0.23	0
																				1.7	0.5472	3.10675
																				1.1	0.43776	2.51281
																				0.5	1.70999	0.2924
																				0.6	0.35568	1.68692
																				0.35	0.12312	2.84278
																				0.15	0.4788	0.31329
																				0.1	0.19152	0.52214
																				1.7	0.83447	2.03721
																				0
																				0.8	0.64295	1.24426
