# Supplementary material for: Paradoxical network excitation by glutamate release from VGluT3+ GABAergic interneurons
Source: eLife. 2020 Feb 13;9:e51996. doi: 10.7554/eLife.51996 (PMC7039679; doi:10.7554/eLife.51996)
Supplement: Table 1—source data 1. [file elife-51996-table1-data1.xlsx]

## Sheet: Sheet1
Table 1
RMP		Input R		Capacitance		Time constant		Sag		SpikeThreshold		Spike Amp		Half Width		Max Slope		Max Decay		F 2X		Adaptation 2X		AHP Amp
BC	DTI	BC	DTI	BC	DTI	BC	DTI	BC	DTI	BC	DTI	BC	DTI	BC	DTI	BC	DTI	BC	DTI	BC	DTI	BC	DTI	BC	DTI
-57	-64	148.946		0.07462		11.1144	24.4135	0.78		-43.32	-26.48	31.95	46.39	0.62	0.72	129.808	177.885	-57.692	-83.333	68.75		0.396		-6.4236	-22.4092
-51	-55	213.807	142.392	0.11717	0.17621	25.0524	25.0914	0.86	0.79	-48.2	-34.66	48.52	43.21	0.92	0.86	138.48	140.625	-64.3382	-67.308	26.25	27.5	0.507	0.26	-5.2973	-15.694
-60	-60	212.692	152.214	0.12603	0.1539	26.805	23.4256	0.79	0.9	-45.42	-34.26	74.53	68.64	0.71	0.56	238.281	289.663	-113.358	-121.094	17.5	36.25	0.52	0.183	-11.5258	-16.033
-50	-61	106.928	132.424	0.18548	0.17668	19.8335	23.3963	0.79	0.86	-44.13	-40.46	52.35	53.15	0.91	1.12	138.625	118.99	-56.25	-49.279	23.75	30	0.534	0.156	-13.6825	-8.5512
-60	-56		249.931		0.09829	30.8481	24.5667	0.8	0.82	-51.12	-43.2	63.29	55.79	0.92	0.62	177.913	245	-62.3775	-100.962	23.75	33.75	0.8	0.334	-8.1085	-13.3186
-63	-45	250.922	137.753	0.14221	0.16845	35.6847	23.2049	0.74	0.75	-47.28	-43.76	50.85	47.58	0.74	0.38	160.846	131.127	-72.3039	-53.922	10	46.25	0.61	0.361	-10.6118	-14.4065
-56	-60	188.275	123.035	0.08929	0.1997	16.8111	24.5697	0.73	0.89	-46.63	-39.91	54.2	56.86	1.1	0.54	133.125	266.827	-55	-123.698	31.25	40	0.53	0.236	-9.324	-12.0919
-55	-62	118.061	147.811	0.18124	0.1696	21.3978	25.0685	0.86	0.88	-48.62	-40.56	48.07	55.41	0.88	0.61	145	241.587	-58.75	-95.052	23.75	43.75	0.59	0.267	-11.4844	-9.4278
	-55	165.08	289.298	0.113	0.10772	18.6545	31.1634	0.82	0.81	-47.1	-44.06	51.86	59.13	0.76	1.03	155.331	159.314	-73.223	-59.7426	38.75	25	0.55	0.7	-10.563	-11.6041
-59	-50	210.477	195.471	0.14531	0.11316	30.5836	22.1194	0.8	0.83	-48.08	-42.72	46.22	53.77	1.12	1.29	119.118	113.125	-41.9471	-39.363	32.5	15	0.519	0.7	-6.1925	-12.0896
-59	-67	296.126	158.566	0.09623	0.13339	28.4975	21.1504	0.72	0.94	-49.5	-48.03	57.71	57.24	0.85	1.07	162.99	141.25	-71.9975	-53.75	25	27.5	0.79	0.68	-10.1313	-10.4875
-64	-55	182.862	155.706	0.09063	0.17369	16.5731	27.044	0.79	0.86	-44.57	-34.09	53.67	50.02	0.55	0.98	206.731	110.937	-98.75	-53.75	23.75	22.5	0.93	0.56	-7.8745	-10.3131
-54	-59	152.771	189.024	0.0927	0.15649	14.1626	29.5807	0.89	0.68	-46.13	-47.09	50.15	56.58	0.99	0.8	138	177.083	-55.625	-76.8995	32.5	31.25	0.438	0.54	-10.0895	-11.1986
-59	-57	203.617		0.12229		24.8997	28.7691	0.89	0.64	-42.18	-43.57	42.05	49.46	0.82	1.05	137.5	107.23	-62.5	-50.2451	32.5	16.25	0.359	0.9	-14.3386	-11.1022
-61	-64	180.561	204.404	0.12992	0.10224	23.4578	20.8984	0.75	0.88	-44.21	-44.4	71.11	58.23	0.58	0.76	296.25	173.713	-125	-74.4485	32.5	27.5	0.446	0.82	-12.0034	-10.7758
-56	-62	301.934	116.43	0.08285	0.1792	25.0154	20.8636	1.08	0.93	-42.48	-45.04	67.75	47.32	0.65	1.25	268.029	98.125	-117.5	-40.3125	31.25	27.5	0.274	0.57	-13.8554	-8.7472
-55	-73	196.901	132.368	0.12456	0.11555	24.5256	15.2946	0.84	0.68	-43.19	-49.2	61.65	58.33	0.72	0.97	223.75	180.409	-93.75	-62.75	32.5	25	0.355	0.408	-14.183	-7.5871
-59	-60	141.815	152.63	0.08688	128.546	12.3206	19.62	0.89	0.9	-44.36	-40.76	57.47	74.3	0.59	0.6	252.604	289.363	-109.375	-119.141	43.75	24	0.233	0.106	-10.0223	-8.0986
-59	-66	95.68	120.19	0.13129	155.337	12.5614	18.67	0.8	0.95	-43.99	-37.72	63.82	59.54	0.6	0.59	259.115	234.375	-119.792	-102.187	30	34	0.36	0.35842	-12.5896	-11.3675
-58	-59	144.54	158.36	112.287	141.829	16.23	22.46	0.84	0.88	-38.7	-37.98	68.53	40.41	0.6	0.98	247.596	116.115	-113.607	-48.077	62.5	37	0.205	0.341443	-5.4132	-6.3163
-58	-57	122.85	41.85	167.033	137.873	20.52	5.77	0.85	0.47	-38.97	-36.06	61.03	34.93	0.75	0.96	186.849	94.351	-92.5481	-39.363	43.75	44	0.163	0.126488	-6.6233	-4.9098
-57	-58	94.25	115.81	181.538	164.839	17.11	19.09	0.85	0.88	-43.35	-34.59	75.28	68.09	0.61	0.69	259.615	252.812	-125.651	-94.375	36.25	23	0.095	0.299536	-3.4029	-12.7885
-51	-60	129.06	135.28	155.199	112.212	20.03	15.18	0.82	0.9	-36	-38.96	53.59	58.09	0.65	0.74	180	186.899	-88.9423	-82.5	37.5	28	0.72	0.26266	-18.2603	-7.7319
-59	-63	81.46	108.82	132.826	192.979	10.82	21	0.63	0.9	-38.47	-38.65	54.93	63.14	0.68	0.7	199.449	198.973	-86.703	-81.5253	50	32	0.326751	0.298445	-8.4355	-12.3601
-56	-53	106.59	113.99	159.959	194.564	17.05	22.1783	0.84	0.66	-37.71	-39.3	67.68	75.13	0.78	0.43	264.724	356.618	-93.75	-190.564	20	48	0.282933	0.355468	-11.4538	-14.2431
-57	-52	115.71	120.03	130.585	149.284	15.11	17.9185	0.86	0.85	-39.73	-30.82	58.32	58.07	0.79	0.49	193.359	242.788	-84.635	-144.375	36	37	0.247754	0.842689	-7.0382	-24.1116
-57		117.47		173.661		20.4		0.85		-32.72		48.27		0.4		221.201		-147.365		58		0.973263		-22.2727
-42		148.14		106.723		15.81		0.86		-40.75		56.69		0.46		248.498		-135.937		67		0.466223		-10.6569
-55		152.96		0		20.79		0.99		-41.67		41.31		0.79		138.125		-58.293		32		0.191192		-3.9538
		123.72		155.189		19.2		0.84		-34.65		57.87		0.69		211.538		-96.029		24		0.101768		-12.7591
-60		83.22		152.127		12.66		0.77		-32.24		45.16		0.74		154.147		-66.406		25		0.186346		-7.2192
-59		161.26		124.891		20.14		0.9		-37.12		53.12		0.82		165.441		-69.547		39		0.369666		-13.6155
		124		169.194		20.98		0.86		-36.59		69.87		1.1		195.772		-64.927		13		0.356813		-10.3613
										-39.11		68.58		0.62		245.189		-103.541		35		0.38214		-8.5127
										-34.91		55.85		0.62		200.12		-98.437		65		0.514769		-10.9579
										-39.88		63.33		0.71		220.937		-97.188		36		0.299705		-11.6794
										-38.05		75.59		0.64		302.584		-114.688		31		0.291094		-10.6408
