# Supplementary figures and images for: Paradoxical network excitation by glutamate release from VGluT3+ GABAergic interneurons
Source: eLife journal article supplement (doi:10.7554/elife.51996), 2020-02-13

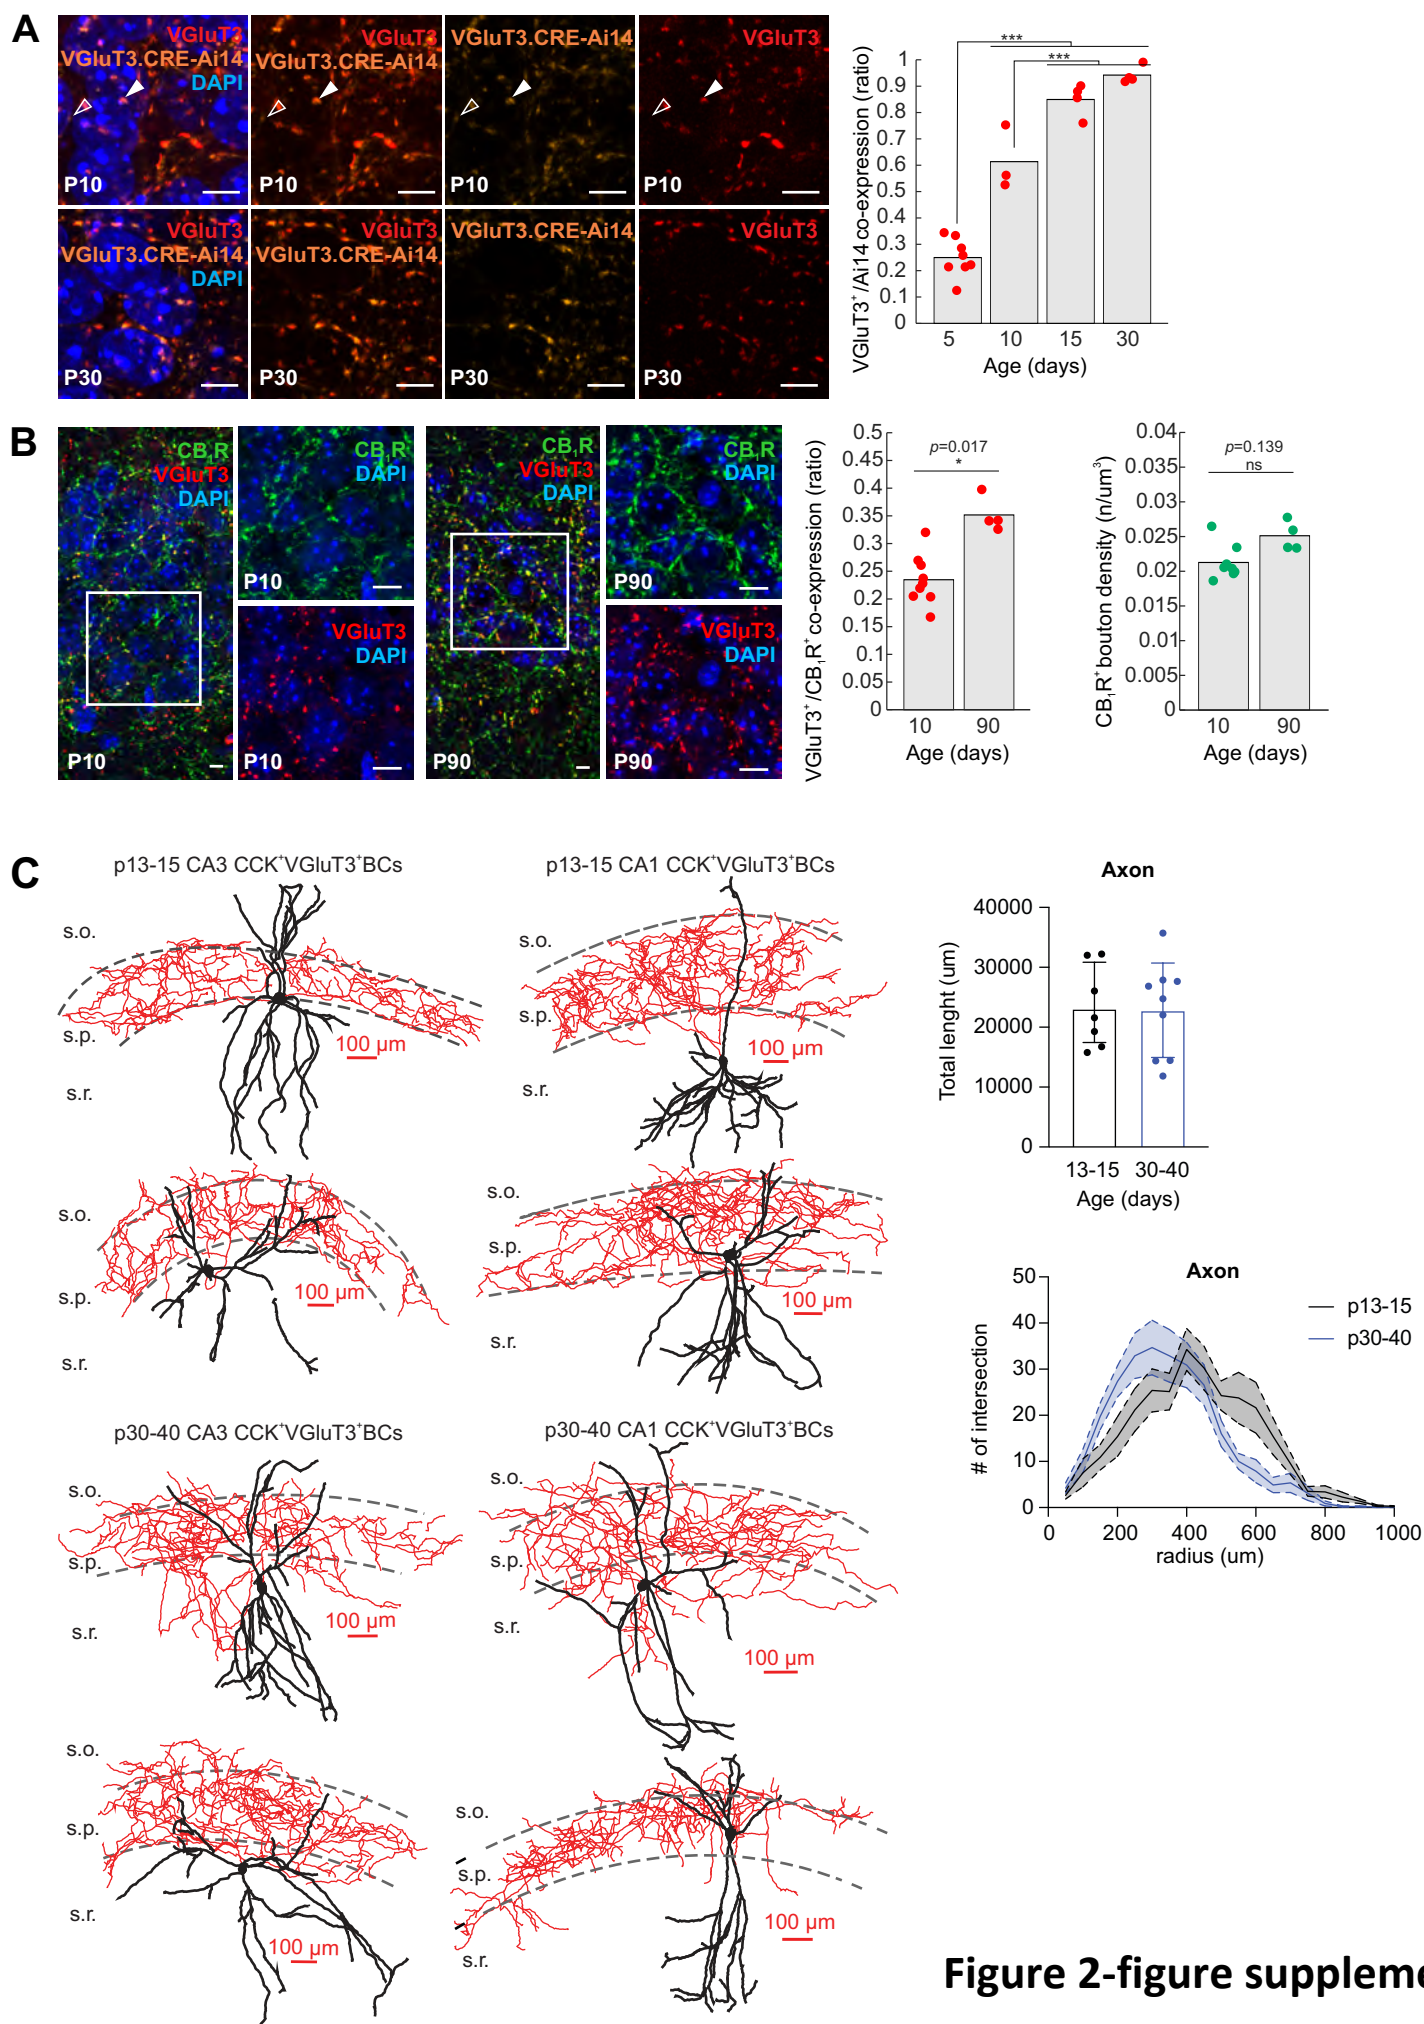

Figure 2-figure supplement 2

Supplement: supp [file elife_poa_e51996_Figure_2_figure_supplement_2.pdf › elife_poa_e51996_Figure_2_figure_supplement_2.pdf]

**A**

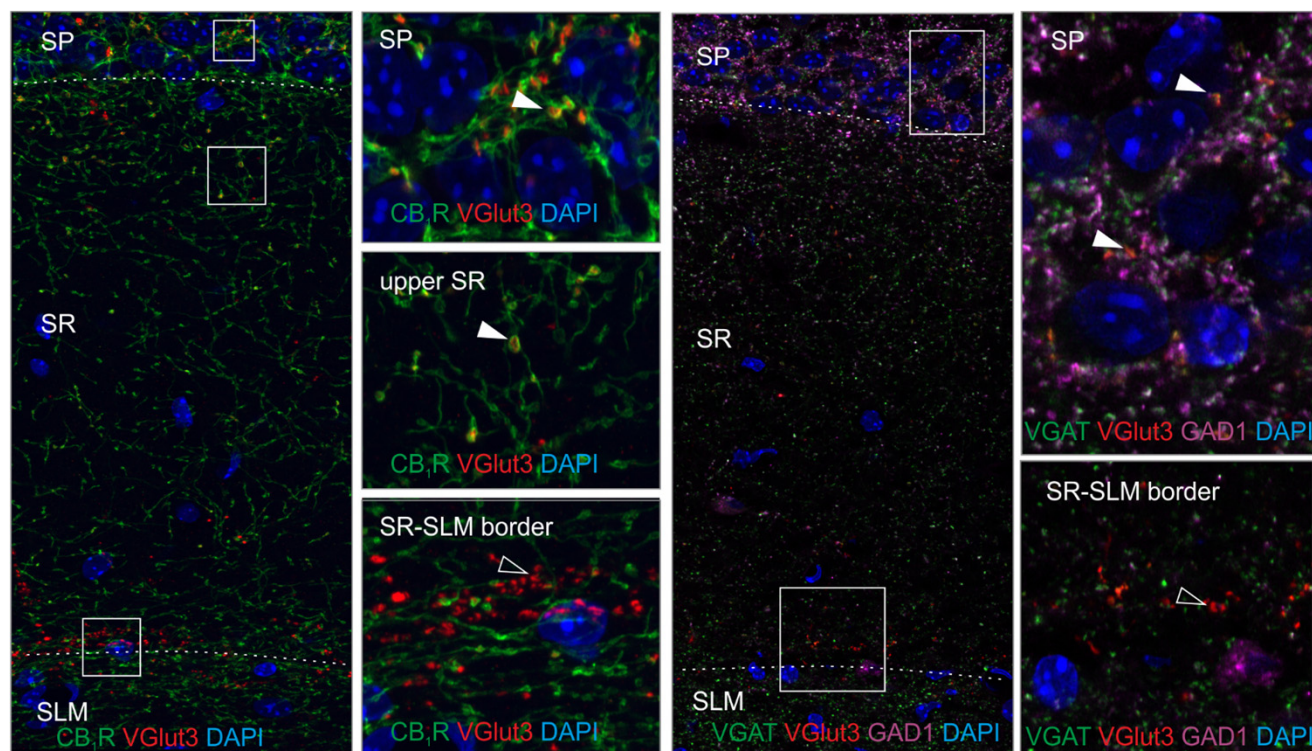

**B**

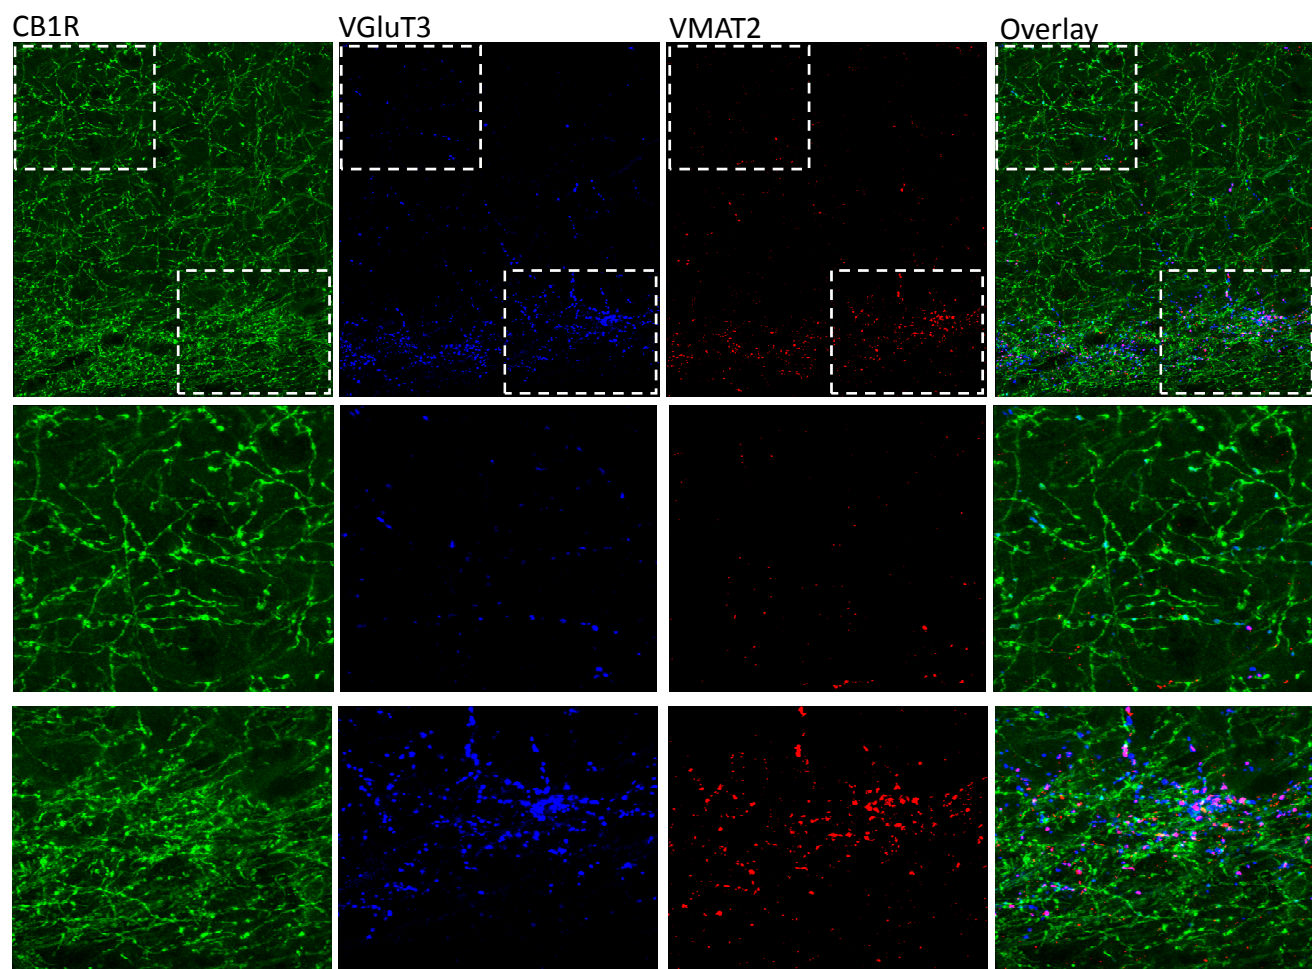

**Figure 3-figure supplement 1**

Supplement: supp [file elife_poa_e51996_Figure_3_figure_supplement_1.pdf › elife_poa_e51996_Figure_3_figure_supplement_1.pdf]

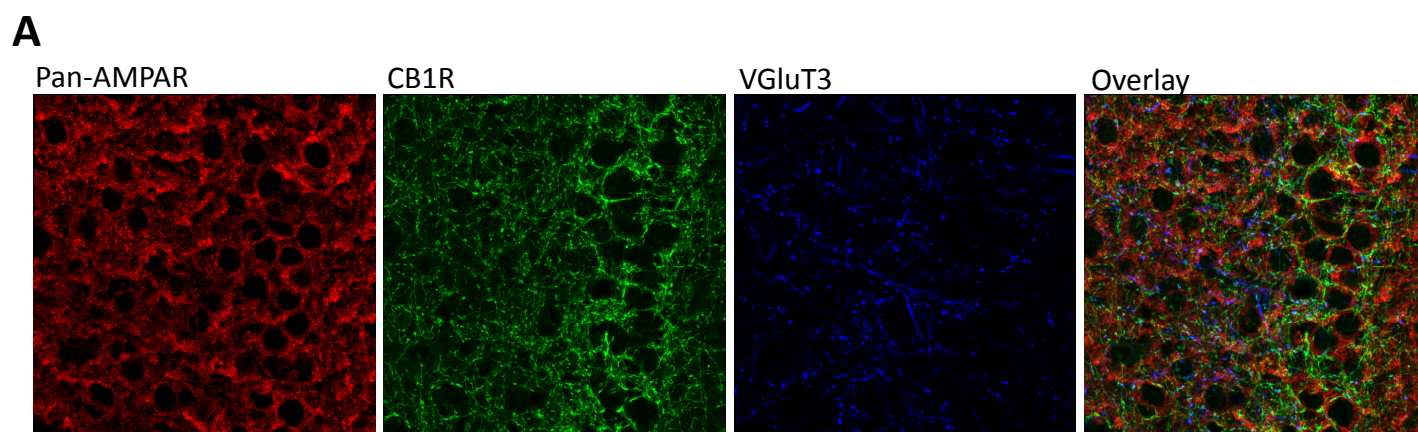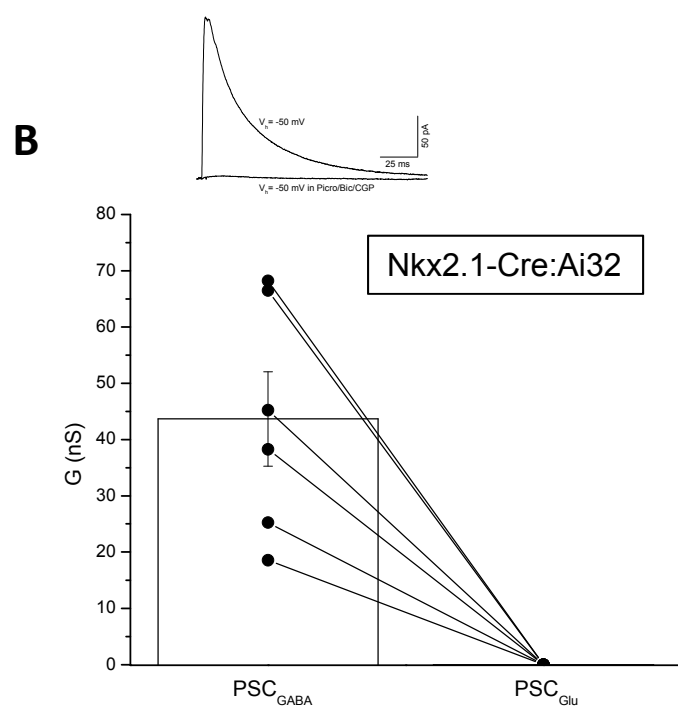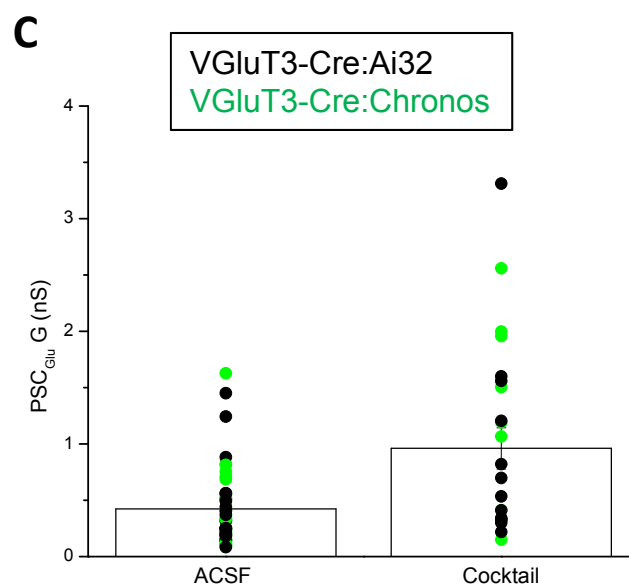

Figure 4-figure supplement 1

Supplement: supp [file elife_poa_e51996_Figure_4_figure_supplement_1.pdf › elife_poa_e51996_Figure_4_figure_supplement_1.pdf]

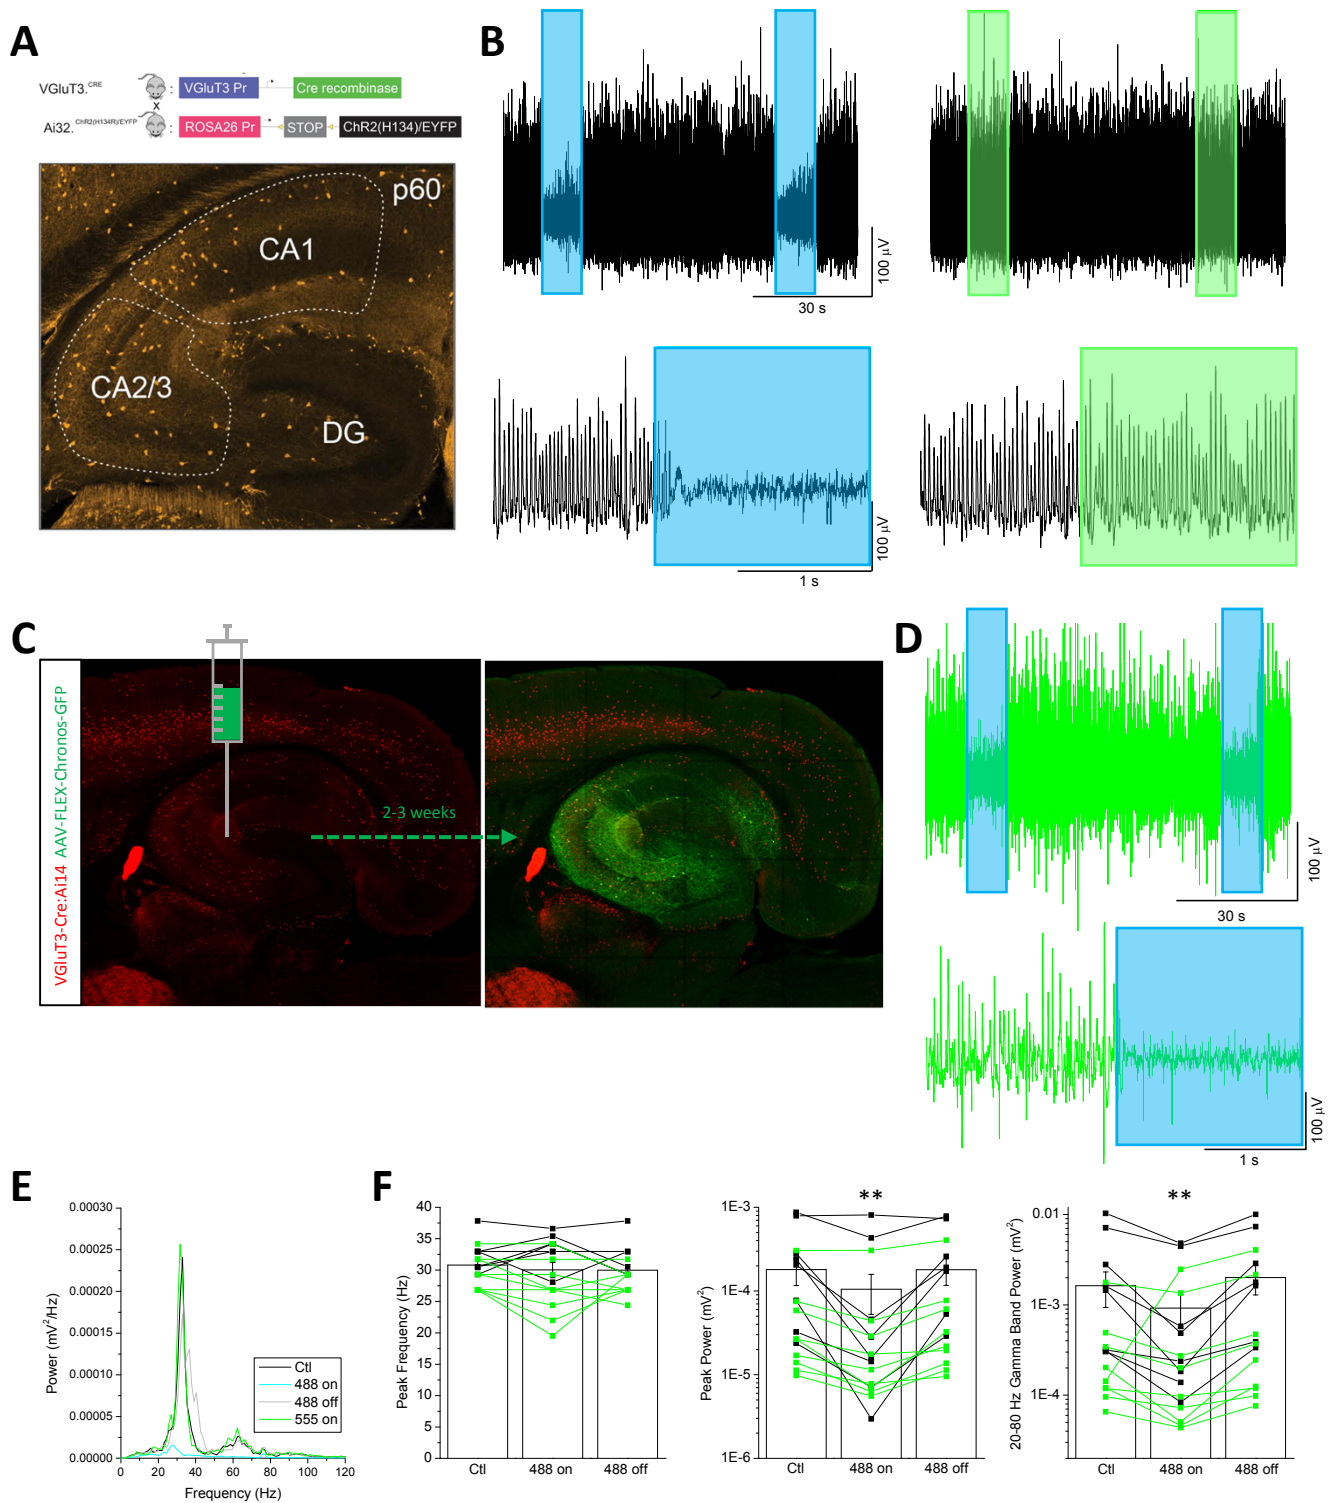

Figure 5-figure supplement 1

Supplement: supp [file elife_poa_e51996_Figure_5_figure_supplement_1.pdf › elife_poa_e51996_Figure_5_figure_supplement_1.pdf]
